# Supplementary material for: Photochemical synthesis, characterization, and electrochemical sensing properties of CD–AuNP nanohybrids
Source: Royal Society of Chemistry journal article supplement (doi:10.1039/d3nr05897b), 2024-01-01
Supplement: d3nr05897b1.pdf [file d3nr05897b1.pdf]

## SUPPORTING INFORMATION

### **Photochemical synthesis, characterization, and electrochemical sensing properties of CDs- AuNPs nanohybrids**

**Giuseppe Nocito<sup>a</sup>, Rayhane Zribi<sup>b</sup>, Meryam Chelly<sup>b</sup>, Luca Pulvirenti<sup>c</sup>, Giuseppe Nicotra<sup>d</sup>,  
Corrado Bongiorno<sup>d</sup>, Antonino Arrigo<sup>a,e,\*</sup>, Barbara Fazio<sup>f,g</sup>, Giovanni Neri<sup>b</sup>, Francesco  
Nastasi<sup>a,e,f,\*</sup> and Sabrina Conoci<sup>a,f,h</sup>**

<sup>a</sup>Department of Chemical, Biological, Pharmaceutical and Environmental Sciences, University of Messina, Viale Ferdinando Stagno d'Alcontres, 31, 98166 Messina, Italy; (Present address for G. Nocito: Consiglio Nazionale delle Ricerche, Istituto per lo Studio dei Materiali Nanostrutturati (CNR-ISMN) URT of Messina at Department of Chemical, Biological and Environmental Sciences, University of Messina, Viale Ferdinando Stagno d'Alcontres, 31, 98168 Messina, Italy)

<sup>b</sup>Department of Engineering, University of Messina, Contrada Di Dio, 98166 Messina, Italy.

<sup>c</sup>Department of Chemical Sciences, University of Catania, Viale Andrea Doria, 6, 95125 Catania, Italy

<sup>d</sup>Consiglio Nazionale delle Ricerche, Istituto per la Microelettronica e Microsistemi (CNR-IMM), Strada VIII, n. 5, Zona Industriale, Catania, 1-95121 Italy

<sup>e</sup>Interuniversity Research Center for Artificial Photosynthesis (Solar Chem, Messina Node), Viale Ferdinando Stagno d'Alcontres 31, 98166 Messina, Italy.

<sup>f</sup>Consiglio Nazionale delle Ricerche, URT Lab-Sens Beyond Nano – Department of Physical Science and Technologies of Matter, Viale Ferdinando Stagno d'Alcontres, 31, 98166 Messina, Italy

<sup>g</sup>Consiglio Nazionale delle Ricerche, Istituto per I Processi Chimico Fisici (CNR-IPCF), Viale Ferdinando Stagno d'Alcontres, 37, 98158 Messina, Italy

<sup>h</sup>Department of Chemistry “Giacomo Ciamician”, University of Bologna, Via Selmi, 2, 40126 Bologna, Italy

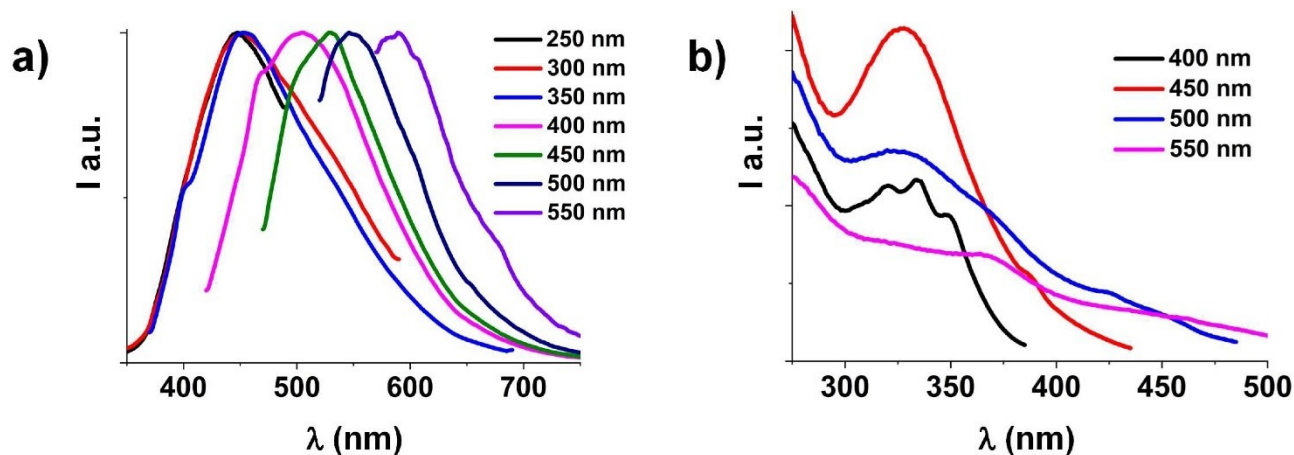

**Figure S1.** Optical spectroscopy characterization of CDs: a) A selection of normalized emission spectra ( $\lambda_{excitation} = 250-550$  nm, excitation wavelength in legend); B) A selection of excitation spectra ( $\lambda_{emission} = 400-550$  nm, emission wavelength in legend)

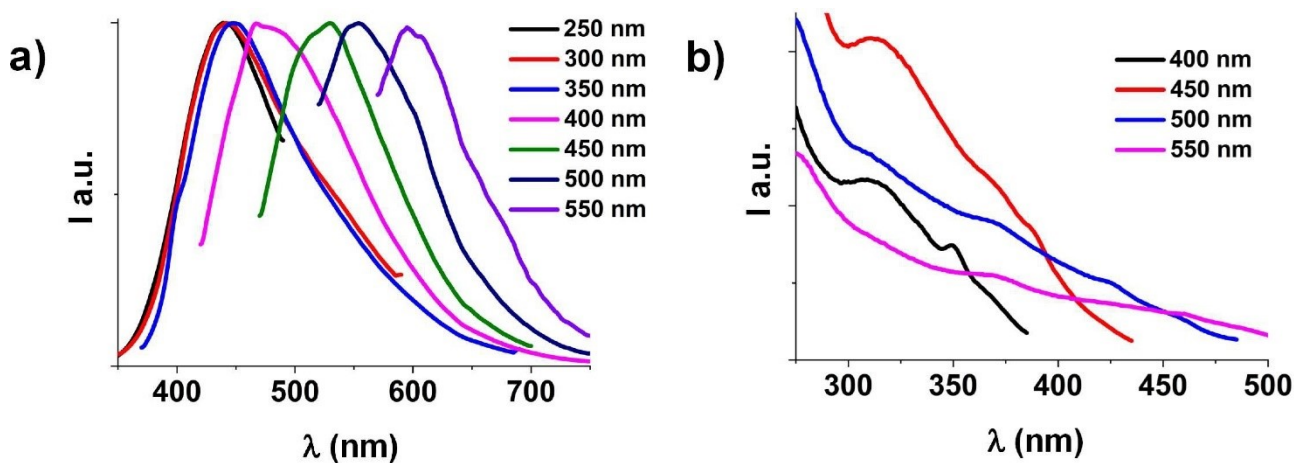

**Figure S2.** Optical spectroscopy characterization of CDs-Ethylendiamine (CDs-E): a) A selection of normalized emission spectra ( $\lambda_{excitation} = 250-550$  nm, excitation wavelength in legend); c) A selection of excitation spectra ( $\lambda_{emission} = 400-550$  nm, emission wavelength in legend)

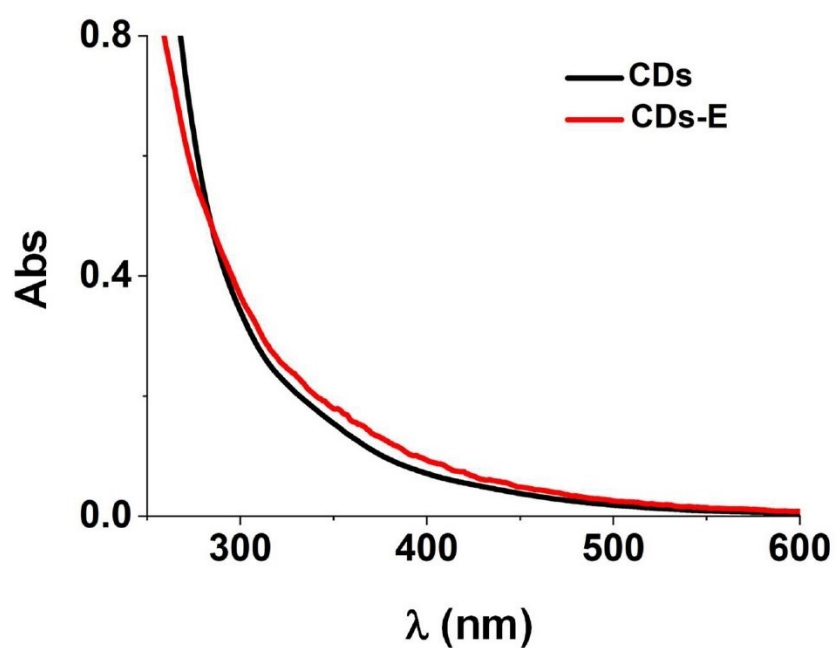

**Figure S3.** UV/Vis absorption spectra of CDs (black line) and CDs-E (red line)

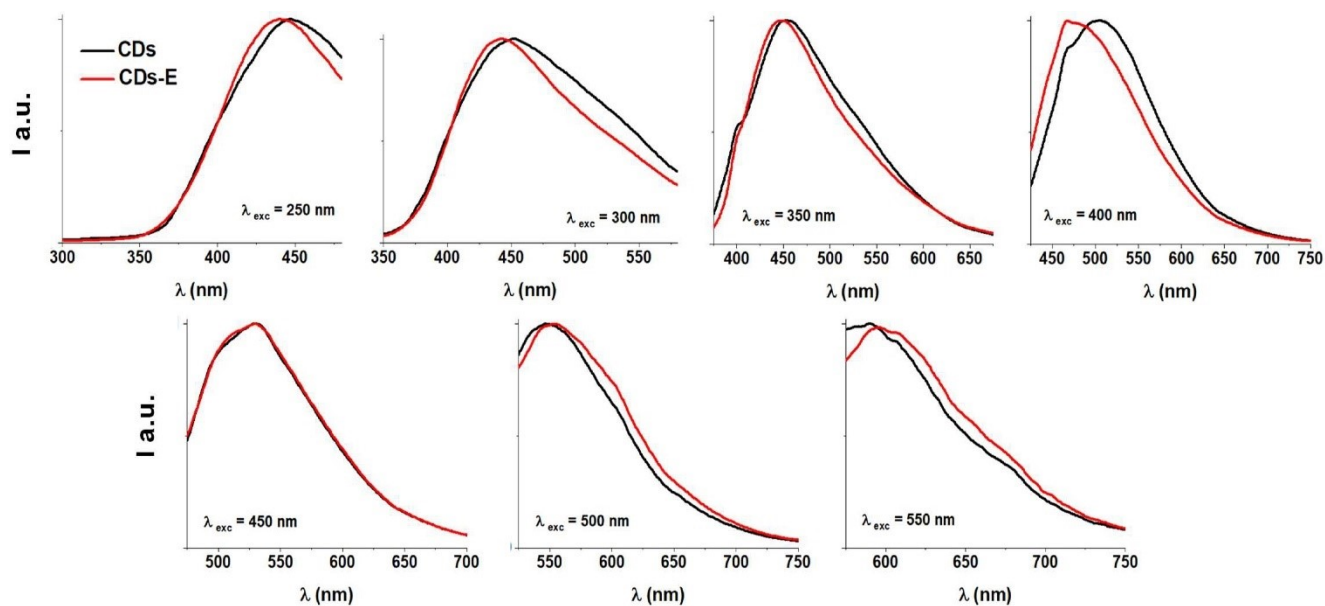

**Figure S4.** Comparison of normalized emission spectra of CDs (black line) and CDs-E (red line). Excitation wavelengths: 250, 300, 350, 400, 450, 500 and 550 nm

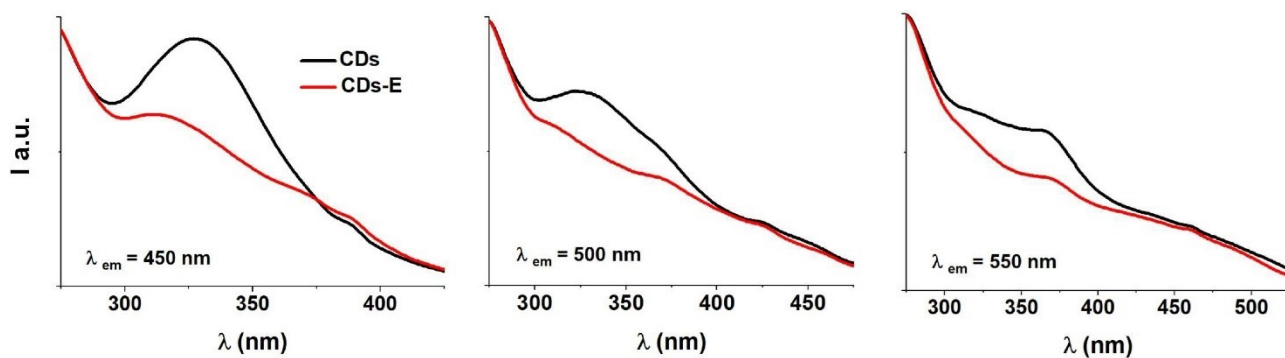

**Figure S5.** Comparison of excitation spectra of CDs (black line) and CDs-E (red line). Emission wavelengths: 450, 500, 550 nm.

**Table S1.** Luminescence lifetimes of CDs-E and CDs. Samples were excited at 408 nm, luminescence lifetimes were recorded at different emission wavelengths.

| $\lambda_{\text{emission}}$ (nm) | CDs-E          |                | CDs            |                |
|----------------------------------|----------------|----------------|----------------|----------------|
| 430                              | 1.70 ns (62 %) | 6.60 ns (38 %) | 1.60 ns (69 %) | 7.20 ns (31 %) |
| 450                              | 2.00 ns (57 %) | 7.80 ns (43 %) | 1.87 ns (57 %) | 7.51 ns (43 %) |
| 470                              | 2.00 ns (52 %) | 8.20 ns (48 %) | 1.97 ns (52 %) | 8.37 ns (48 %) |
| 490                              | 2.20 ns (48 %) | 8.50 ns (52 %) | 2.27 ns (45 %) | 8.67 ns (55 %) |
| 510                              | 2.50 ns (49 %) | 8.20 ns (51 %) | 2.40 ns (42 %) | 8.87 ns (58 %) |
| 530                              | 2.45 ns (45 %) | 8.80 ns (54 %) | 2.57 ns (43 %) | 8.93 ns (57 %) |

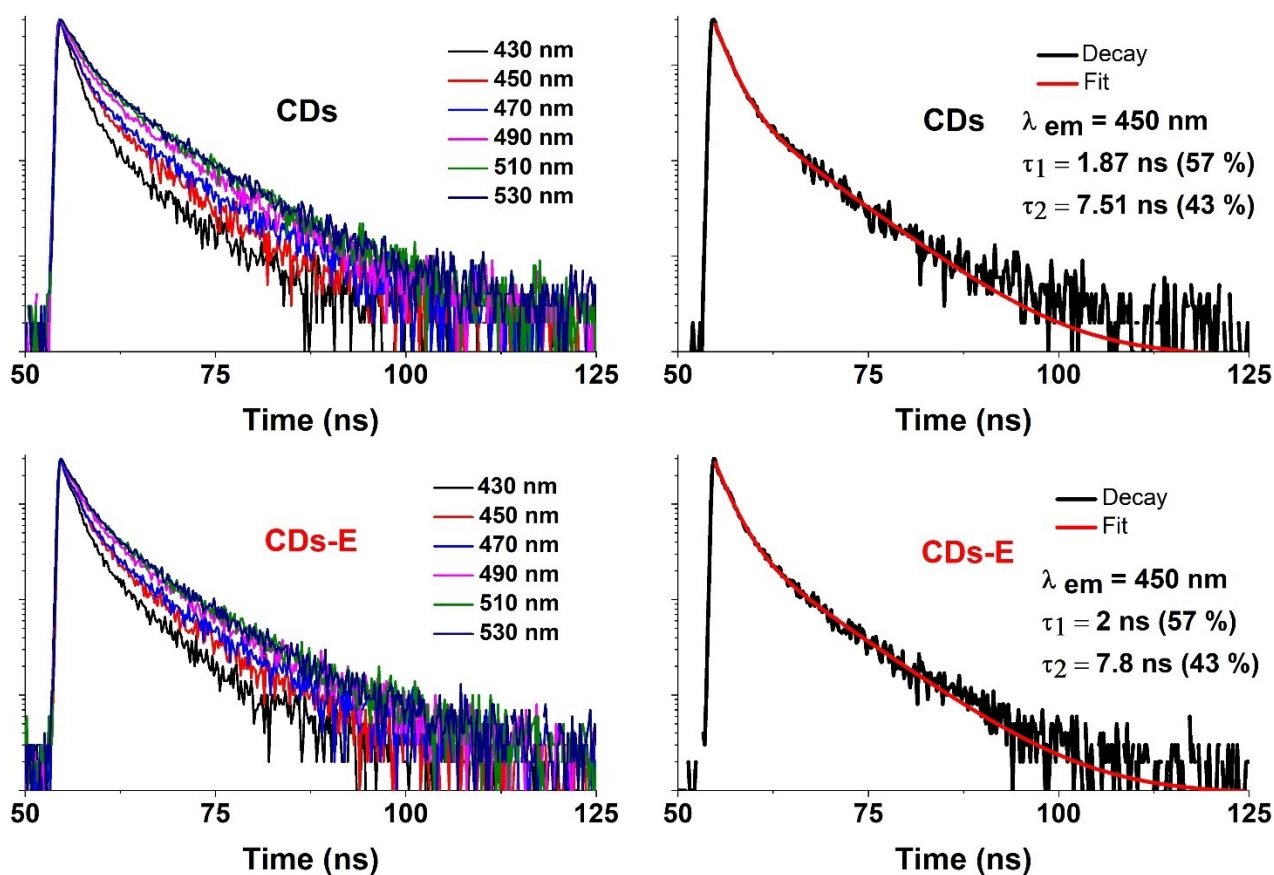

**Figure S6.** Photoluminescence lifetimes of CDs and CDs-E: a) Decays recorded on different luminescence wavelengths of CDs; b) Lifetimes of CDs on  $\lambda_{\text{emission}} = 450 \text{ nm}$ ; c) Decays recorded on different luminescence wavelengths of CDs-E; d) Lifetimes of CDs-E on  $\lambda_{\text{emission}} = 450 \text{ nm}$ .

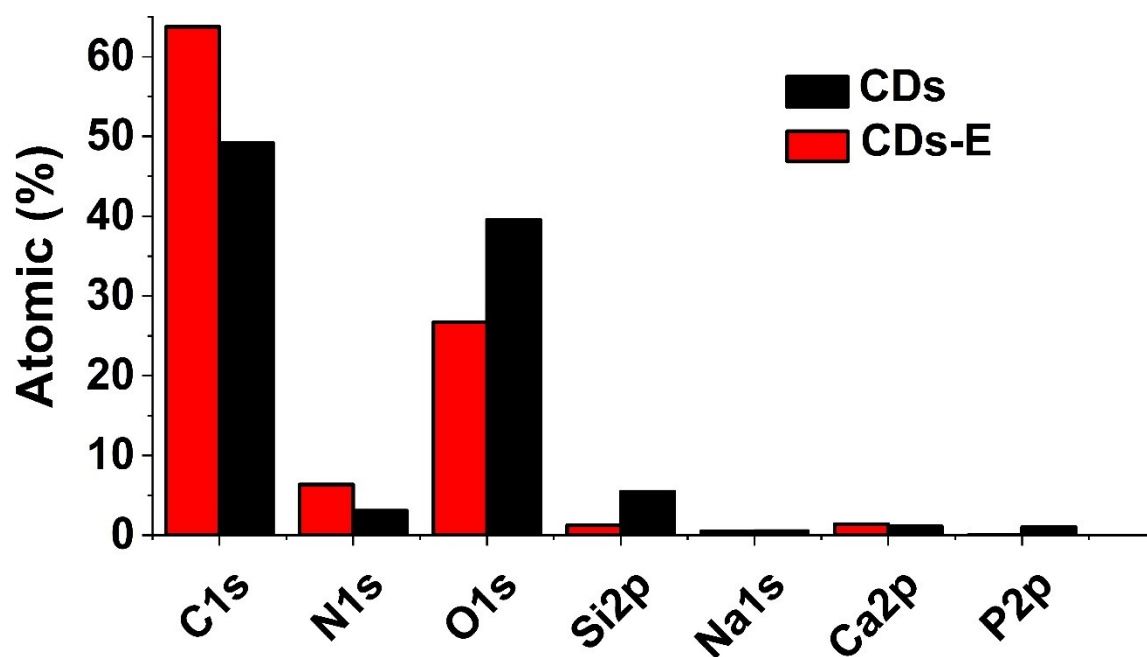

**Figure S7.** Quantitative XPS analysis of CDs (black bar) and CDs-E (red bar).

**Table S2.** Zeta potential measurements of CDs and CDs-E aqueous dispersions estimated via the Dynamic Light Scattering (DLS) technique.

| SAMPLE | PDI<br>(Polydispersity<br>index) | ZETA<br>POTENTIAL<br>(mV) |
|--------|----------------------------------|---------------------------|
| CDs    | $0.192 \pm 0.038$                | $-23.40 \pm 0.87$         |
| CDs-E  | $0.465 \pm 0.051$                | $-32.70 \pm 2.36$         |

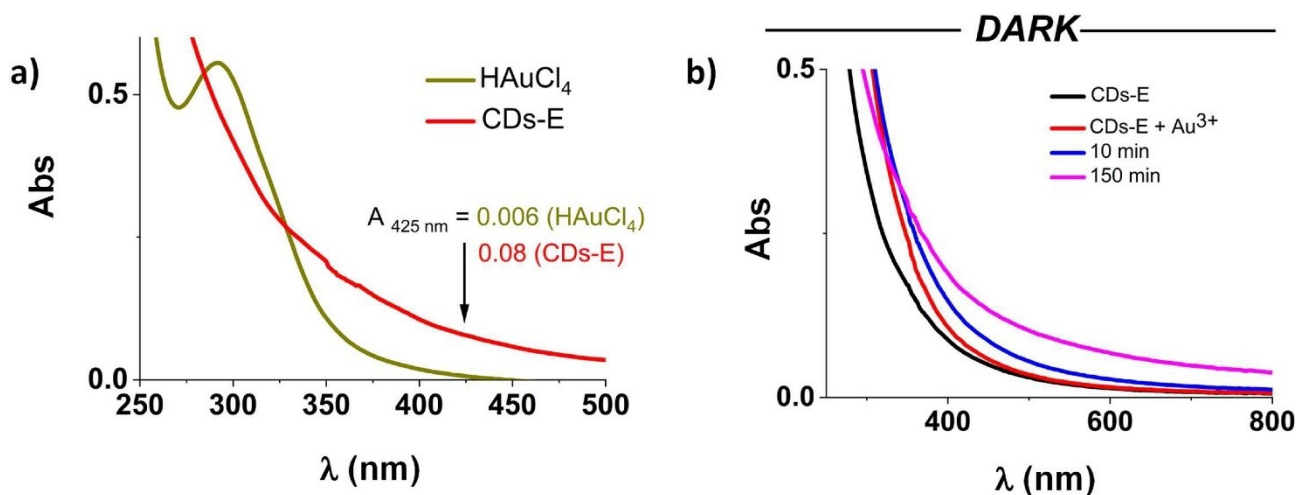

**Figure S8.** a) UV/Vis absorption spectra of  $\text{HAuCl}_4$   $2.5 \cdot 10^{-4}$  mol/L and CDs-E in ultrapure water; b) Control experiment of CDs-Au nanohybrid synthesis, absorption spectral changes in darkness conditions using CDs-E.

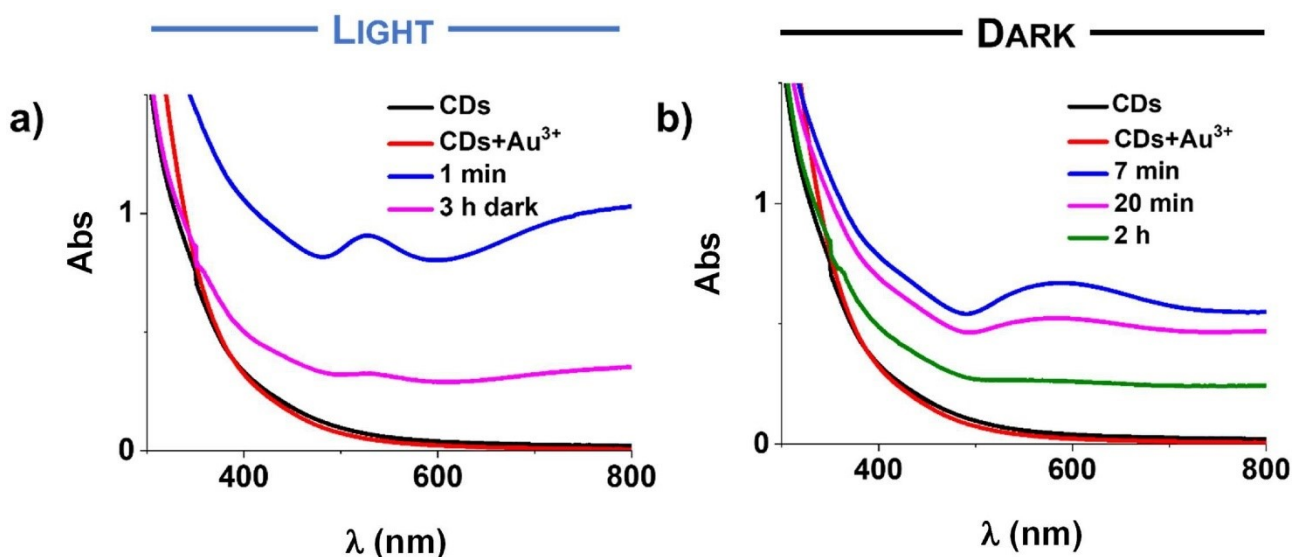

**Figure S9.** Control experiment performed with CDs as reducing and capping agent: a) Blue (420-430 nm) light irradiated sample, b) Control in darkness condition.

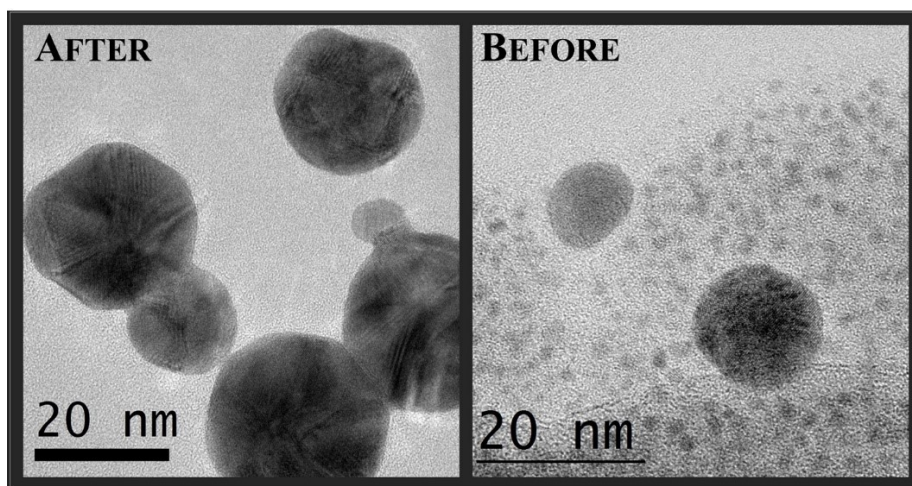

**Figure S10.** TEM images of CDs-Au nanohybrid before and after purification

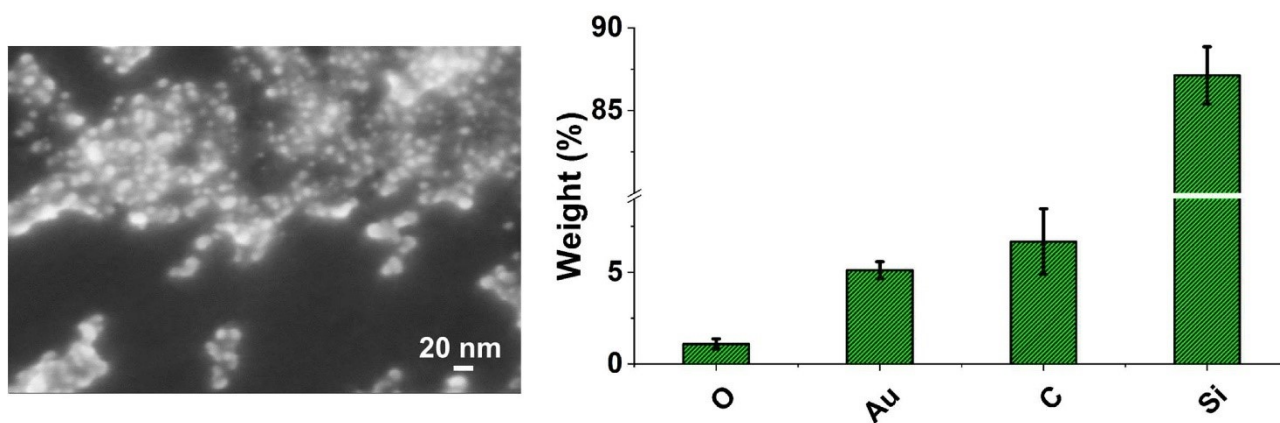

**Figure S11.** a) SEM micrograph of CDs-Au nanohybrid (scalebar 20 nm). b) Energy-dispersive X-ray spectroscopy (EDS) characterization of CDs-Au nanohybrid on the SEM micrograph area of Fig. S11a.

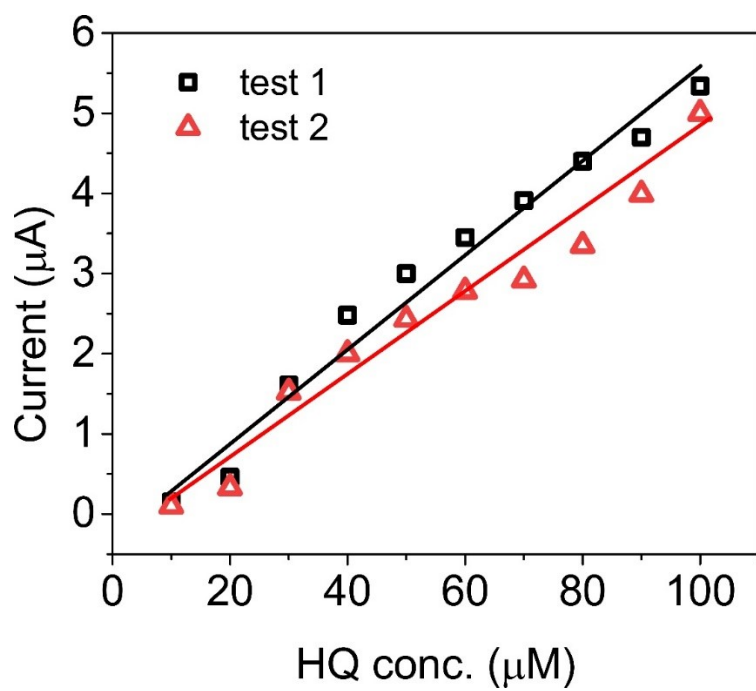

**Figure S12.** Current ( $\mu\text{A}$ ) versus hydroquinone concentrations ( $\mu\text{M}$ ) for two tests performed for HQ detection with the same CDs-Au/SPCE sensor. Test 2 was replied after one week under identical operating conditions.
